# Supplementary material for: An ultra-durable icephobic coating by a molecular pulley
Source: Royal Society of Chemistry journal article supplement (doi:10.1039/c9sm00162j), 2019-01-01
Supplement: c9sm00162j1.pdf [file c9sm00162j1.pdf]

**Electronic Supplementary Information**

## Ultra-durable Icephobic Coating by Molecular pulley

*Yizhi Zhuo, Tong Li, Feng Wang, Verner Håkonsen, Senbo Xiao, Jianying He\* and Zhiliang Zhang\**

NTNU Nanomechanical Lab, Department of Structural Engineering, Norwegian University of Science and Technology (NTNU), Trondheim 7491, Norway.

**Corresponding Author**

\*E-mail: [jianying.he@ntnu.no](mailto:jianying.he@ntnu.no); [zhiliang.zhang@ntnu.no](mailto:zhiliang.zhang@ntnu.no)

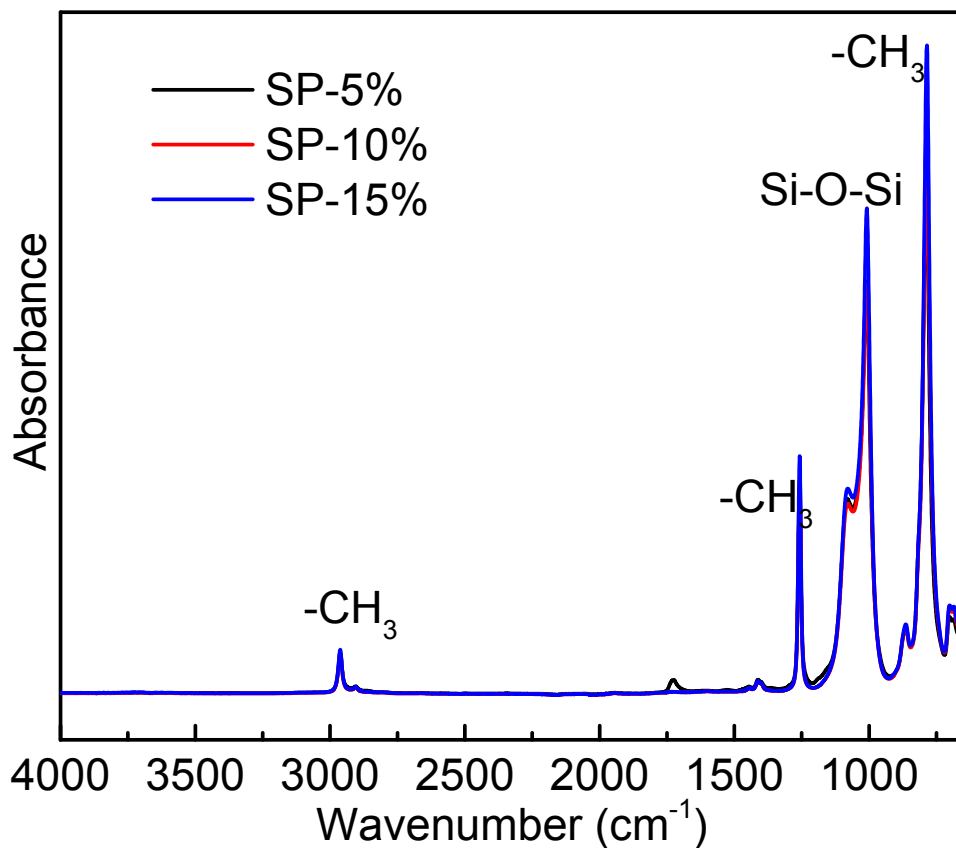

**Fig. S1** ATR-FTIR spectra of SP. The signal at around 2963 cm<sup>-1</sup> corresponds to the stretching vibration of -CH<sub>3</sub>, while the signal at around 1256 cm<sup>-1</sup> and 786 cm<sup>-1</sup> are attributed to the bending vibration of -CH<sub>3</sub>. The signal at around 1081 cm<sup>-1</sup> and 1009 cm<sup>-1</sup> are the result of vibration of Si-O-Si. Since the content of polyrotaxane crosslinker is too low, there is no obvious signal from the groups of polyrotaxane.

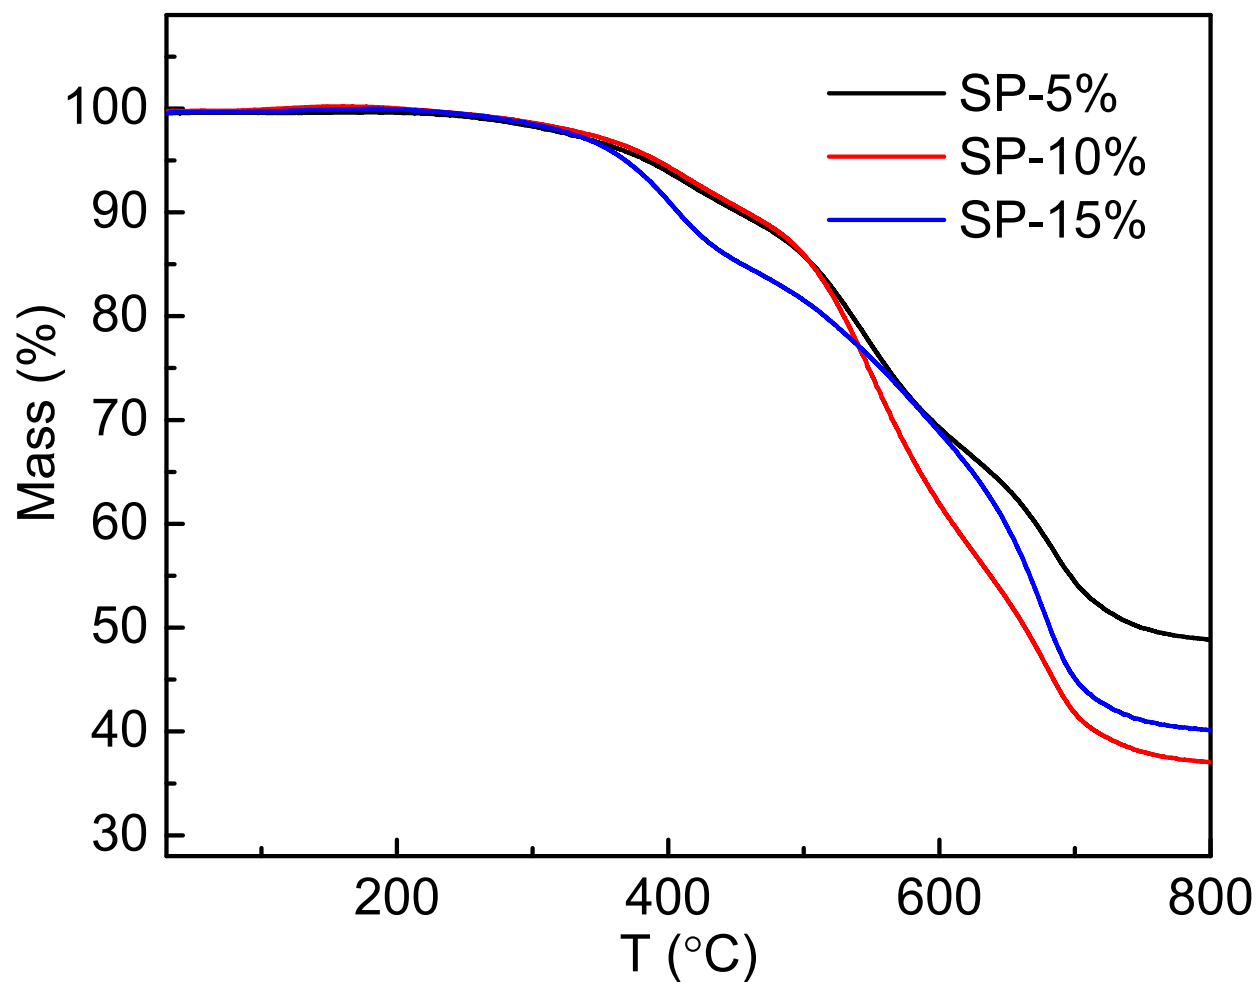

**Fig. S2** Thermalgravimetric analysis shows that the temperature at 5% weight loss for SP-5%, SP-10%, and SP-15% is 383, 390, and 368 °C respectively, meaning that the prepared materials show excellent thermal stability.

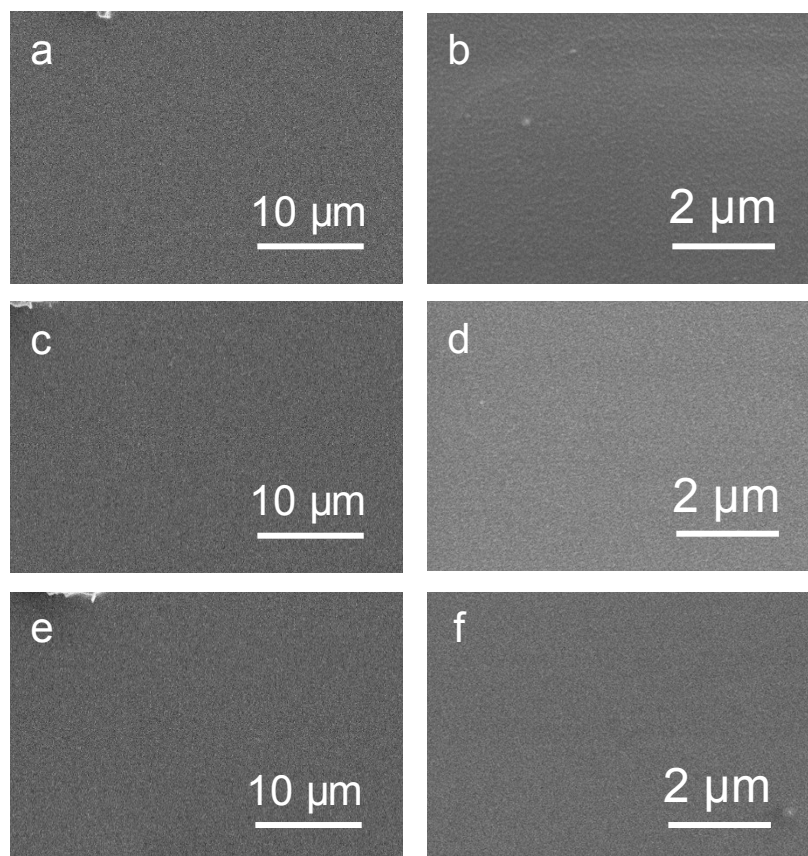

**Fig. S3** SEM images of (a, b) SP-5%, (c, d) SP-10%, and (e, f) SP-15%. All of the coatings are homogeneous, smooth and intact.

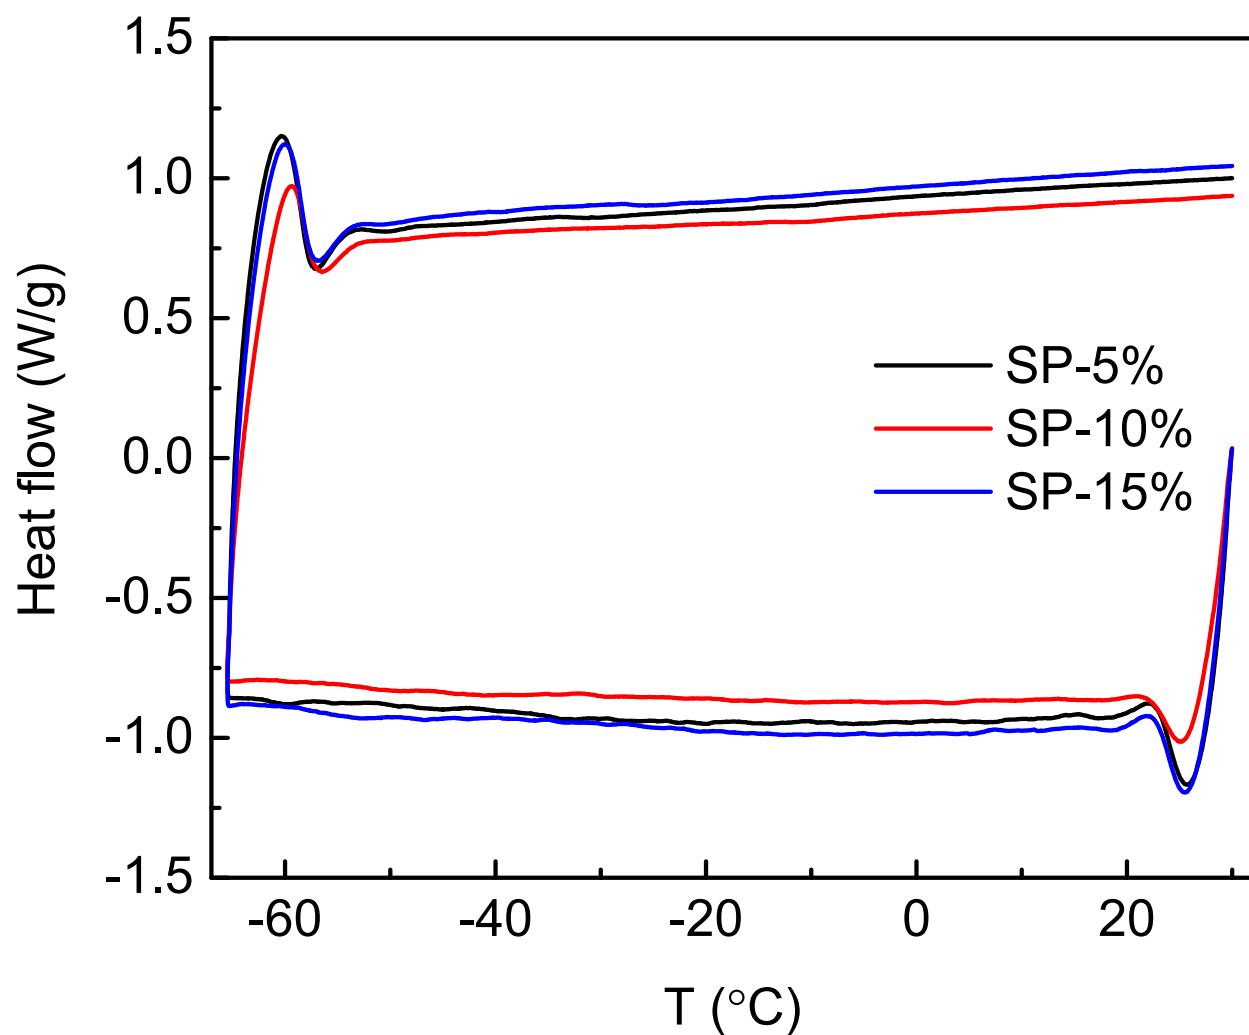

**Fig. S4** DSC shows that there is no signal of glass transition temperature from -65 °C to 30 °C.

1. Zhuo, Y.; Håkonsen, V.; He, Z.; Xiao, S.; He, J.; Zhang, Z., Enhancing the Mechanical Durability of Icephobic Surfaces by Introducing Autonomous Self-Healing Function. *ACS applied materials & interfaces* **2018**, *10* (14), 11972-11978.
